# Supplementary material
Source: PubMed Central journal article supplement (PMC3234944)
Supplement: supp_M111.289058_jbc.M111.289058-1.pdf [file supp_M111.289058_jbc.M111.289058-1.pdf]

Supplementary information for  
**The nonproton ligand sensing domain is required for  
paradoxical stimulation of ASIC3 channels by amiloride**

**Wei-Guang Li<sup>1,3\*</sup>, Ye Yu<sup>1,2\*</sup>, Chen Huang<sup>3</sup>, Hui Cao<sup>1,3</sup>, Tian-Le Xu<sup>1,3</sup>**

To whom correspondence should be addressed. E-mail: [xu-happiness@shsmu.edu.cn](mailto:xu-happiness@shsmu.edu.cn) (T.L.X.)

**This file includes:**

Supplementary Figures 1 to 3 and their legends

Supplementary Table 1

## Supplementary Figure 1 by Li *et al.*

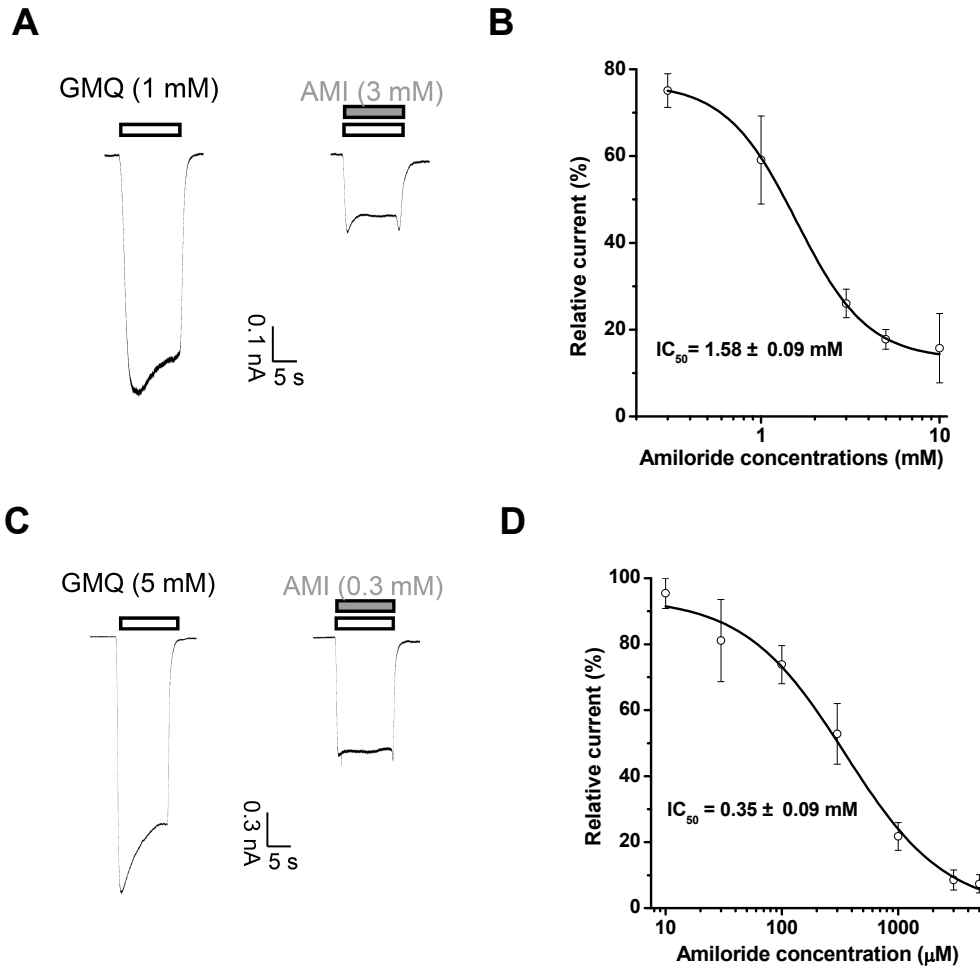

**Supplementary Figure 1. Effects of amiloride (AMI) on the GMQ-mediated ASIC3 activation.** *A,C* Typical recording for the effects of amiloride (3 mM, *A*; 0.3 mM, *C*) on the GMQ (1 mM, *A*; 5 mM, *C*)-induced currents in ASIC3-expressing CHO cells. *B,D* Dose-dependent inhibitory effects of amiloride on GMQ (1 mM, *B*; 5 mM, *D*)-evoked currents in ASIC3-expressing CHO cells. Data points are means ± S.E.M. of four to five measurements and the solid lines are the fit to the Hill equation.

## Supplementary Figure 2 by Li et al.

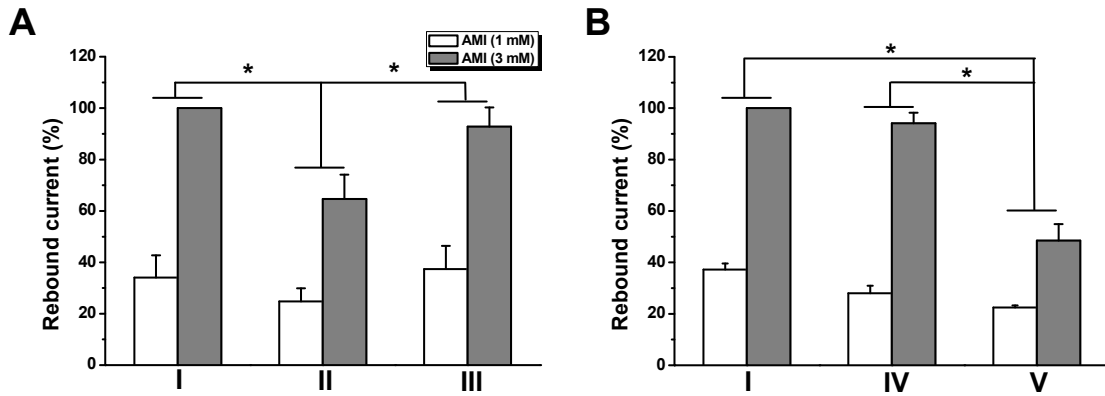

**Supplementary Figure 2. Statistical analysis of effects of DTDP on the peak currents of ASIC3<sup>E79C</sup> channels upon washout of AMI at 1 and 3 mM.** A,B Pooled data from experiments in Fig. 6C and 6D, respectively. Data points are means  $\pm$  S.E.M. of six measurements of the peak currents induced after AMI washout, normalized to the peak currents upon washout of 3 mM AMI before DTDP treatment. \* $p < 0.05$ , different between groups as indicated.

Supplementary Figure 3 by Li *et al.*

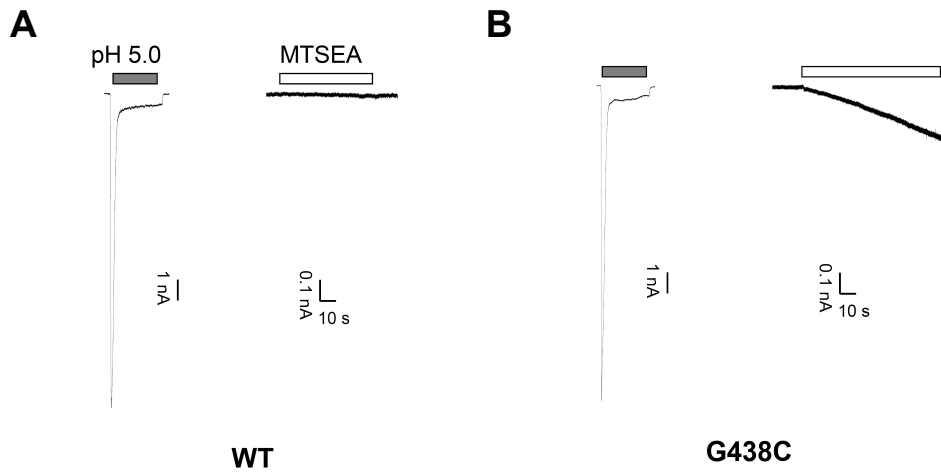

Supplementary Figure 3. Typical recordings showing the effect of MTSEA on WT (A) or G438C (B) mutant ASIC3 channel activation.

## Supplementary Table 1 by Li *et al.*

**Supplementary Table 1. Current amplitude of ASIC3 mutants (data from Figure 3).**

| Mutants | pH 5.0 (pA)   | AMI-1 mM (pA) | AMI-3 mM (pA) |
|---------|---------------|---------------|---------------|
| WT      | 11744 ± 1468  | 1579 ± 433    | 2002 ± 607    |
| E79A    | 1618 ± 519    | 5.1 ± 1.8     | 41.4 ± 15.8   |
| E79C    | 3606 ± 705    | 32 ± 8.5      | 133.2 ± 47.6  |
| E79D    | 3298 ± 533    | 72.7 ± 16.5   | 138.8 ± 18.4  |
| E79L    | 6255 ± 2620   | 398.0 ± 86.4  | 696.7 ± 140.1 |
| E79Q    | 10082 ± 2173  | 184.3 ± 42.6  | 452.7 ± 137.1 |
| E79R    | 4884 ± 875    | 59.4 ± 17.2   | 229.3 ± 53.8  |
| E79S    | 6129 ± 529    | 150.4 ± 21.9  | 865.4 ± 85.8  |
| E423A   | 9023 ± 913    | 14.8 ± 9.1    | 44.9 ± 16.4   |
| E423C   | 4928 ± 1987   | 4.3 ± 1.3     | 11.0 ± 3.1    |
| E423D   | 744.3 ± 195.4 | 1.5 ± 0.6     | 4.4 ± 1.6     |
| E423L   | 12152 ± 648   | 9.3 ± 4.8     | 36.3 ± 21.1   |
| E423Q   | 8675 ± 588    | 10.6 ± 2.5    | 72.7 ± 20.2   |
| E423R   | 3754 ± 814    | 8.7 ± 1.9     | 15.7 ± 1.0    |
| E423S   | 1254 ± 245    | 6.7 ± 0.7     | 16.4 ± 1.9    |
